# Supplementary material for: Charged nanoplastics differentially affect the conjugative transfer of antibiotic resistance genes
Source: Royal Society of Chemistry journal article supplement (doi:10.1039/d3en00229b), 2023-01-01
Supplement: d3en00229b1.pdf [file d3en00229b1.pdf]

**Supplementary Material:**

## **Charged Nanoplastics Differentially Affects the Conjugative Transfer of Antibiotic Resistance Genes**

Haiqing Wang,<sup>a, b</sup> Yongtao Xu,<sup>a</sup> Zhenda Liang,<sup>a</sup> Zhiquan Chen,<sup>a</sup> Li Zhou,<sup>a,\*</sup> Bing Yan<sup>a, b</sup>

*a. Institute of Environmental Research at Greater Bay Area, Key Laboratory for Water Quality and Conservation of the Pearl River Delta, Ministry of Education, Guangzhou University, Guangzhou, 510006, P. R. China*

*b. School of Environmental Science and Engineering, Shandong University, Jinan, 250100, P. R. China*

**\*Corresponding author:** zhoul@gzhu.edu.cn (L. Zhou)

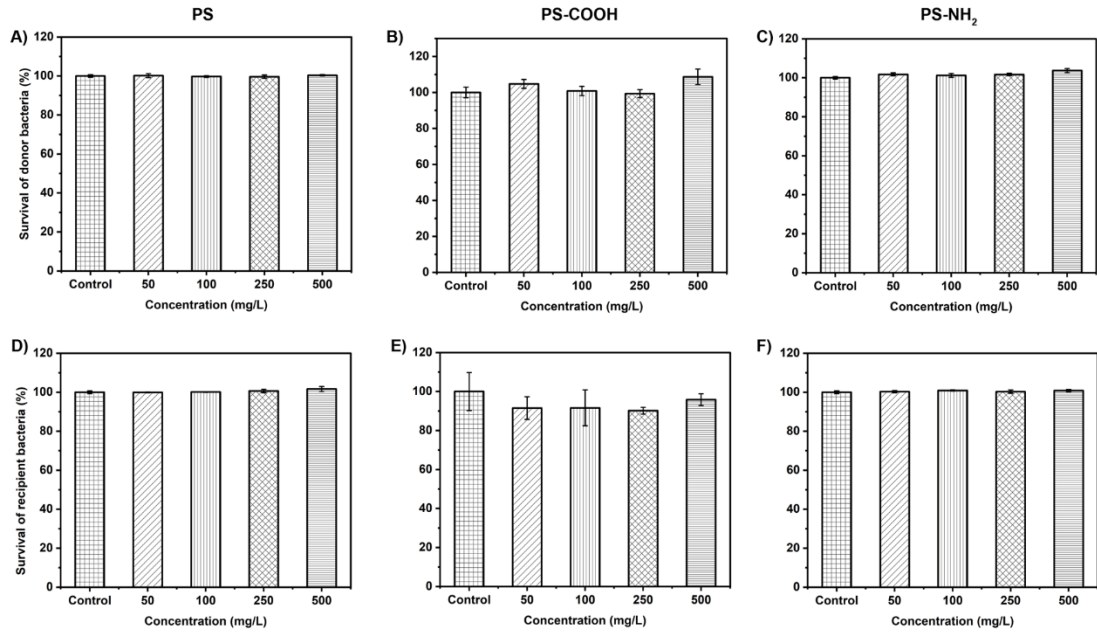

Figure S1 Relative viability of *E. coli* DH5 $\alpha$  (top) and *E. coli* K12 (bottom) after incubating with different amounts of PS (A, D), PS-COOH (B, E), and PS-NH<sub>2</sub> (C, F). Number of experiments  $N \geq 3$ .

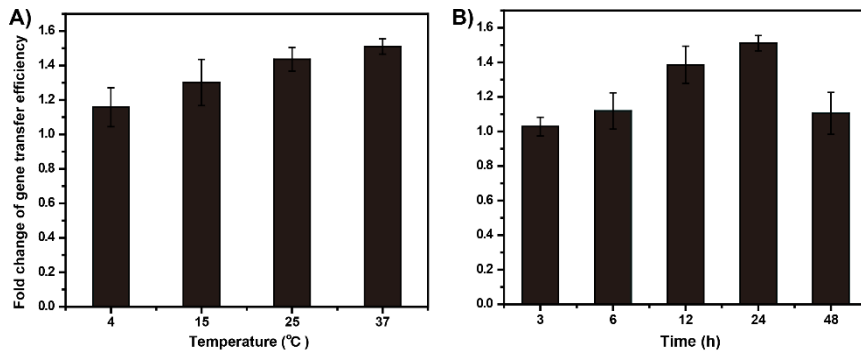

Figure S2 Effects of mating temperature (A) and times (B) on the conjugative transfer of RP4. The concentration of bacteria is  $OD_{600} = 0.06$ . All values are represented as mean  $\pm$  SD. Number of experiments  $N \geq 3$ .

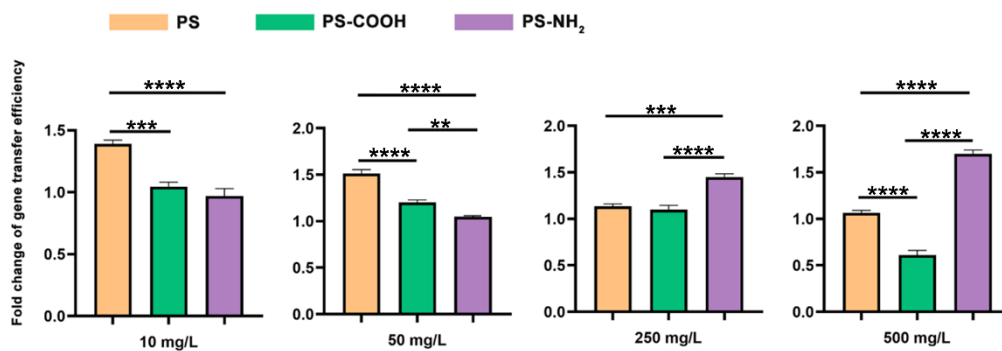

Figure S3 Significant differences between groups (shown in Figure 2) that tested with independent-samples t-test (\*\* represents  $p < 0.01$ , \*\*\* represents  $p < 0.001$  and \*\*\*\* represents  $p < 0.0001$ ).

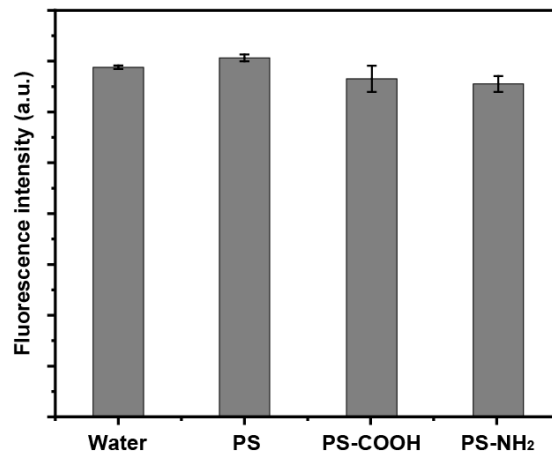

Figure S4 The fluorescence of water, PS, PS-COOH and PS-NH<sub>2</sub> under excitation of 488 nm. The emission at 525 nm was recorded. The concentration of the nanoplastics used is 500 mg/L. Number of experiments  $N \geq 3$ .

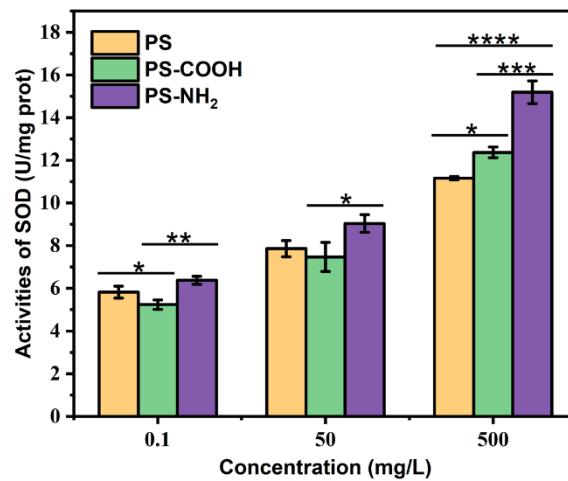

Figure S5 The bacterial SOD activity under exposure of differentially charged nanoplastics. Significant differences between groups (shown in Figure 2) were tested with independent-samples t-test (\* represents  $p < 0.05$ , \*\* represents  $p < 0.01$ , \*\*\* represents  $p < 0.001$  and \*\*\*\* represents  $p < 0.0001$ ). Number of experiments  $N \geq 3$ .

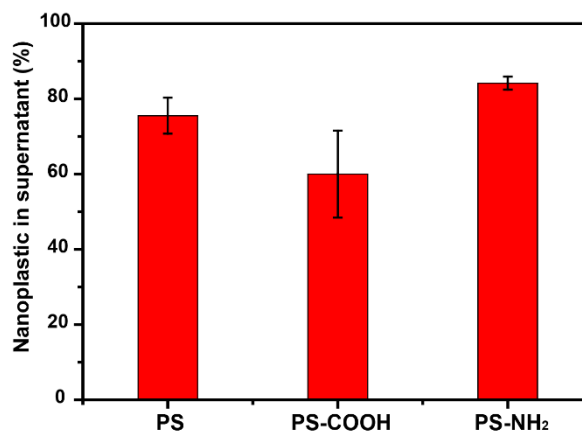

Figure S6 The amounts of nanoplastics in the supernatant. The nanoplastics (500 mg/L) were mixed with the bacteria. After incubation for 1 min, the mixture was centrifuged (8000 rpm, 5 min). The nanoplastics in the supernatant was detected by Pyrolysis-Gas Chromatography/Mass Spectrometry. Without bacteria, negligible amount of nanoplastics were detected in the pellet. Number of experiments  $N \geq 3$ .

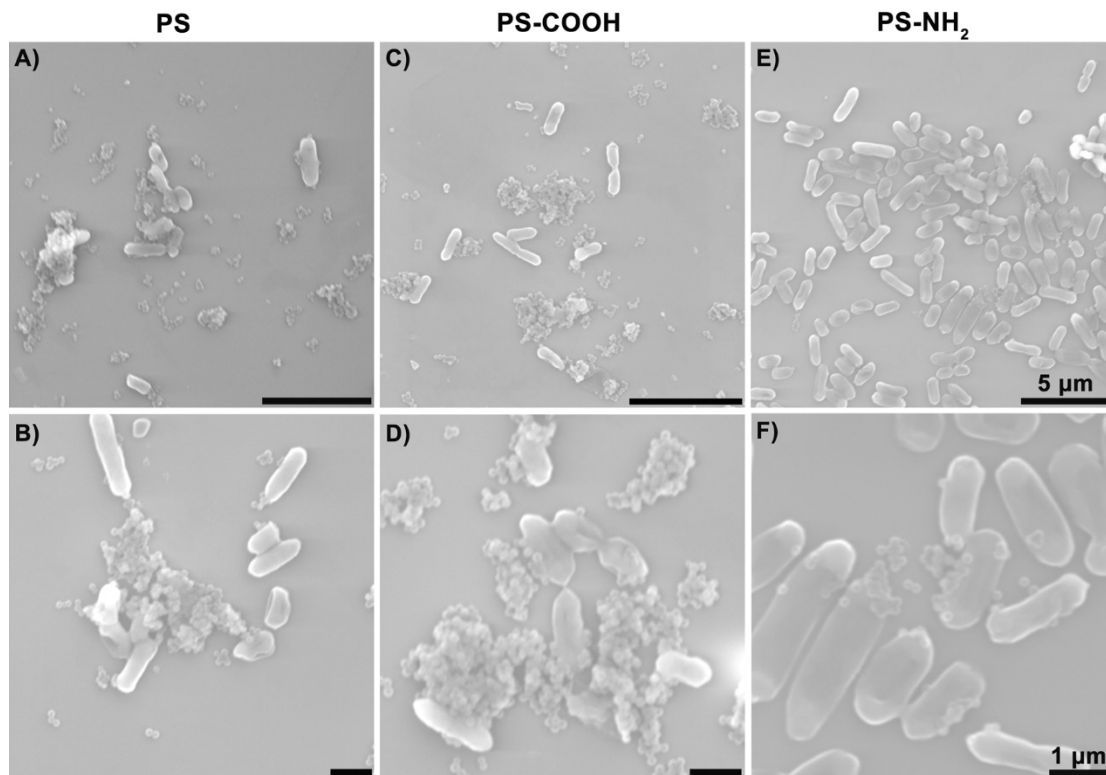

Figure S7 SEM images of bacteria treated with 500 mg/L PS (A and B), PS-COOH (C and D) and PS-NH<sub>2</sub> (E and F).

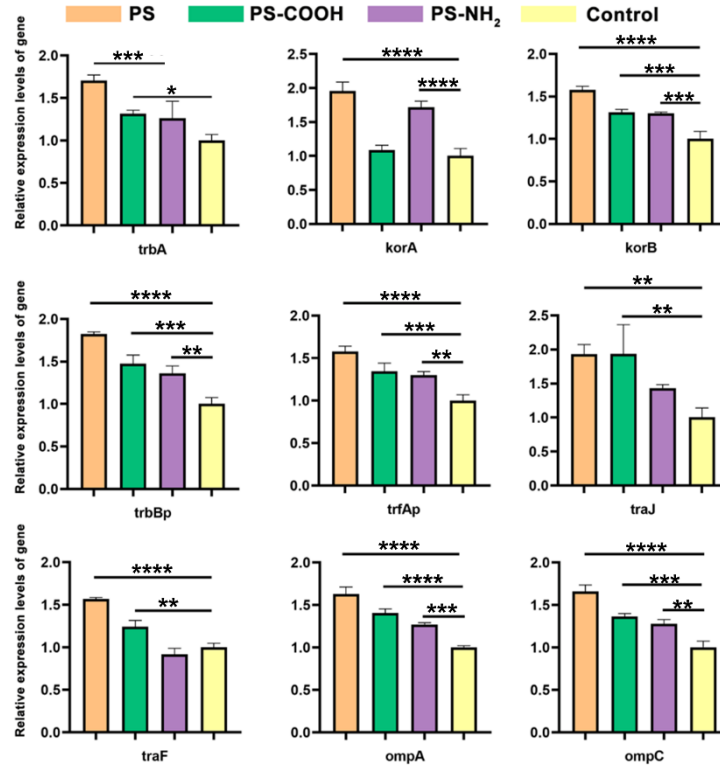

Figure S8 Significant differences between groups (shown in Figure 7) that tested with independent-samples t-test (\* represents  $p < 0.05$ , \*\* represents  $p < 0.01$ , \*\*\* represents  $p < 0.001$  and \*\*\*\* represents  $p < 0.0001$ ).

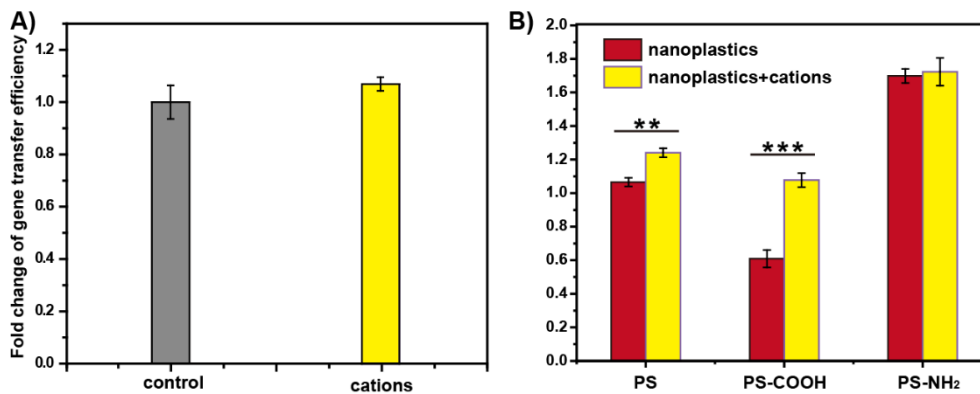

Figure S9 Fold changes of gene transfer efficiency under exposure of cations (A) and cations+nanoplastics (B) when compared to the control. Ca<sup>2+</sup> (10 mM) and Mg<sup>2+</sup> (10 mM) ions were mixed and used as cation solution in the experiment. The concentrations of nanoparticles used was 500 mg/L. Significant differences between groups were tested with independent-samples t-test (\*\* represents  $p < 0.01$  and \*\*\* represents  $p < 0.001$ ). Number of experiments  $N \geq 3$ .

Table S1 Primer sequences used in this study.

| Gene            | primer            | Sequence (5'-3')         | Length of product (bp) |
|-----------------|-------------------|--------------------------|------------------------|
| <i>16S rRNA</i> | <i>16S rRNA-F</i> | CCTACGGGAGGCAGCAG        | 194                    |
|                 | <i>16S rRNA-R</i> | ATTACCGCGGCTGCTGG        |                        |
| <i>trbA</i>     | <i>trbA-F</i>     | TGGAAACTCCCCTACCTCTT     | 120                    |
|                 | <i>trbA-R</i>     | CCACACTGATGCGTTCGTAT     |                        |
| <i>korA</i>     | <i>korA-F</i>     | TCGGGCAAGTTCCTGTCC       | 147                    |
|                 | <i>korA-R</i>     | GCAGCAGACCATCGAGATA      |                        |
| <i>korB</i>     | <i>korB-F</i>     | CTGGTCGGCTTCGTTGTA       | 149                    |
|                 | <i>korB-R</i>     | TGAAGTCACCCATTTTCGGT     |                        |
| <i>trbBp</i>    | <i>trbBp-F</i>    | CGCGGTCGCCATCTTCACG      | 131                    |
|                 | <i>trbBp-R</i>    | TGCCCCGAGCCAGTACCGCCAATG |                        |
| <i>traJ</i>     | <i>traJ-F</i>     | GCCCGTGATTTTGTAGCCC      | 151                    |
|                 | <i>traJ-R</i>     | TGAAACCAAGCCAACCAGGAA    |                        |
| <i>traF</i>     | <i>traF-F</i>     | GGCAACCTCGTCGCCTTTA      | 118                    |
|                 | <i>traF-R</i>     | GCAAGTCGGCGTGTTTTTCG     |                        |
| <i>trfAp</i>    | <i>trfAp-F</i>    | GAAGCCCATCGCCGTCGCCTGTAG | 183                    |
|                 | <i>trfAp-R</i>    | GCCGACGATGACGAACTGGTGTGG |                        |
| <i>ompA</i>     | <i>ompA-F</i>     | TGAGCCTGGGTGTTTCCTA      | 161                    |
|                 | <i>ompA-R</i>     | CAGAGCAGCCTGACCTTCC      |                        |
| <i>ompC</i>     | <i>ompC-F</i>     | AAGTAGTAGGTAGCACCAACATCA | 163                    |
|                 | <i>ompC-R</i>     | GGGCGAACAAGCACAGAA       |                        |

Table S2 The physical properties of nanoplastics used in the study.

|                    | TEM size (nm) $\pm$ SD | DLS (nm) $\pm$ SD | $\zeta$ -potential (mV) $\pm$ SD |
|--------------------|------------------------|-------------------|----------------------------------|
| PS                 | 139.04 $\pm$ 16.5      | 155.74 $\pm$ 8.73 | -26.32 $\pm$ 0.63                |
| PS-COOH            | 126.51 $\pm$ 7.78      | 146.25 $\pm$ 8.11 | -37.65 $\pm$ 1.11                |
| PS-NH <sub>2</sub> | 129.63 $\pm$ 5.78      | 144.18 $\pm$ 5.29 | 21.07 $\pm$ 0.4                  |

Table S3 Descriptive statistics of *16S rRNA* genes based on the crossing point (CP) of control, PS, PS-COOH and PS-NH<sub>2</sub> samples. The analysis was carried out with BestKeeper software.

| Factor          | <i>16S rRNA</i> |
|-----------------|-----------------|
| N               | 4               |
| GM [CP]         | 3.49            |
| AM [CP]         | 3.50            |
| Min [CP]        | 3.18            |
| Max [CP]        | 3.77            |
| SD [+/- CP]     | 0.27            |
| CV [%CP]        | 7.64            |
| Min [x-fold]    | -1.24           |
| Max [x-fold]    | 1.21            |
| SD [+/- x-fold] | 1.20            |

Abbreviations: N: number of samples; GM [CP]: the geometric mean of CP; AM [CP]: the arithmetic mean of CP; Min [CP] and Max [CP]: the extreme values of CP; SD [ $\pm$  CP]: the standard deviation of the CP; CV [%CP]: the coefficient of variance expressed as a percentage on the CP level; Min [x-fold] and Max [x-fold]: the extreme values of expression levels expressed as an absolute x-fold over- or under-regulation coefficient; SD [ $\pm$  x-fold]: standard deviation of the absolute regulation coefficients.

Gene with the SD higher than 1 can be considered inconsistent.<sup>1</sup> According to BestKeeper, the lower the SD, the greater the stability of gene expression. Thus the *16S rRNA* was considered to be a stably expressed gene.

## References

1. M. W. Pfaffl, A. Tichopad, C. Prgomet, T. P. Neuvians, Determination of stable housekeeping genes, differentially regulated target genes and sample integrity: BestKeeper–Excel-based tool using pair-wise correlations. *Biotechnol. Lett.*, 2004, **26**, 509.
